# Supplementary material for: Benzophenones from Anemarrhena asphodeloides Bge. Exhibit Anticancer Activity in HepG2 Cells via the NF-κB Signaling Pathway
Source: PubMed Central journal article supplement (PMC6630431; doi:10.3390/molecules24122246), 2019-06-15
Supplement: molecules-24-02246-s001.pdf [file molecules-24-02246-s001.pdf]

## SPPLEMENTARY MATERIAL

Article

# **Benzophenones from *Anemarrhena asphodeloides* Bge. Exhibit Anticancer Activity in HepG2 Cells via the NF- $\kappa$ B Signaling Pathway**

**De-Ling Wu** <sup>1,2,3,†</sup>, **Zhen-Dong Liao** <sup>2,†</sup>, **Fang-Fang Chen** <sup>2</sup>, **Wei Zhang** <sup>2,3</sup>, **Ya-Shuo Ren** <sup>2,3</sup>, **Can-Can Wang** <sup>2</sup>, **Xiao-Xiao Chen** <sup>2</sup>, **Dai-Yin Peng** <sup>2,\*</sup> and **Ling-Yi Kong** <sup>1,\*</sup>

<sup>1</sup> Jiangsu Key Laboratory of Bioactive Natural Product Research and State Key Laboratory of Natural Medicines, School of Traditional Chinese Pharmacy, China Pharmaceutical University, 24 Tong Jia Xiang, Nanjing 210009, China; dlwu7375@sina.com

<sup>2</sup> School of Pharmacy, Anhui University of Chinese Medicine, Hefei 230012, China; yyfhwz@163.com (Z.-D.L.); rtsjxfc@163.com (F.-F.C.); zhangwei@ahtcm.edu.cn (W.Z.); renyashuo@gmail.com (Y.-S.R.); cancanW1120@163.com (C.-C.W.); 15077919652@163.com (X.-X.C.)

<sup>3</sup> Anhui Province Key Laboratory of Traditional Chinese Medicine Decoction Pieces of New Manufacturing Technology, Anhui University of Chinese Medicine, Hefei 230012, China

\* Corresponding; pengdaiyin@163.com (D.-Y.P.); cpu\_lykong@126.com (L.-Y.K.); Tel.: +86-0551-68129004 (D.-Y.P.); +86-25-83271405 (L.-Y.K.)

† These authors contributed equally to this work

## List of supplementary content

**Figure S1.1** UV spectrum of compound **1**

**Figure S1.2** IR spectrum of compound **1**

**Figure S1.3**  $^1\text{H}$  NMR spectrum (800 MHz,  $\text{DMSO-}d_6$ ) of compound **1**

**Figure S1.4**  $^{13}\text{C}$  NMR spectrum (200 MHz,  $\text{DMSO-}d_6$ ) of compound **1**

**Figure S1.5** DEPT spectrum (200 MHz,  $\text{DMSO-}d_6$ ) of compound **1**

**Figure S1.6** HMBC spectrum (800 MHz,  $\text{DMSO-}d_6$ ) of compound **1**

**Figure S1.7** HSQC spectrum (800 MHz,  $\text{DMSO-}d_6$ ) of compound **1**

**Figure S1.8** HRESIMS spectrum of compound **1**

**Figure S1.9** Calculating OR spectra of compound **1**

**Table S1** Growth inhibition of HepG2 and Hep3B cells in the presence of different compounds after 72 h incubation (IC<sub>50</sub> values in nM).

# 光谱峰值检测报告

2019/02/28 13:41:58

数据集: ZLZD-23 - RawData

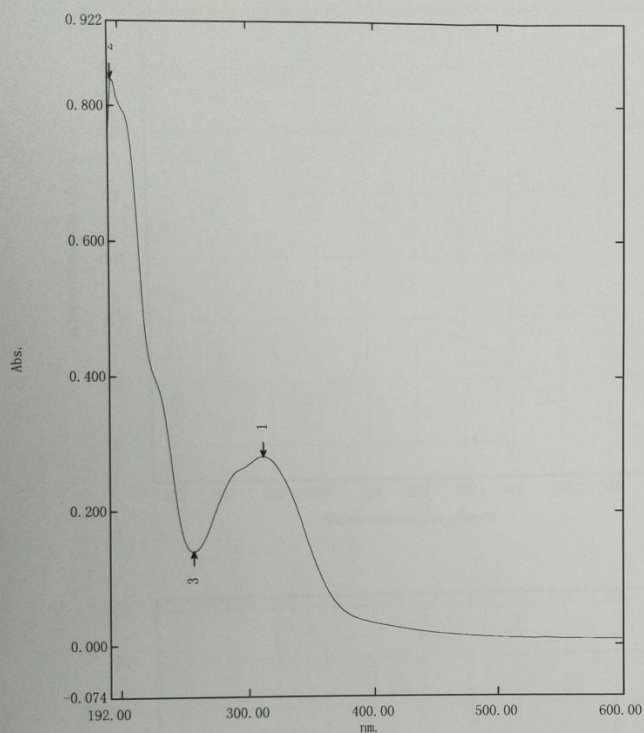

[测定属性]  
 波长范围 (nm): 192.00 到 600.00  
 扫描速度: 中速  
 采样间隔: 0.5  
 自动采样间隔: 启用  
 扫描模式: 单个

[仪器属性]  
 仪器类型: UV-2700 系列  
 测定方式: 吸收值  
 狭缝宽: 5.0 nm  
 积分时间: 0.1 秒  
 光源转换波长: 323.0 nm  
 检测器单元: 直接  
 S/R 转换: 标准  
 阶梯校正: OFF

[附件属性]  
 附件: 无

[数据处理参数]  
 阈值: 0.0010000  
 点: 4  
 内插: 停用  
 平均: 停用

[样品准备属性]  
 重量: 0.67mg  
 体积: 1ml  
 稀释: 30倍  
 光程长: 10mm  
 附加信息: 2019/02/28 13:38:06  
 ZLZD-23 MeOH

| No. | P/V | 波长 (nm) | Abs.  | 描述 |
|-----|-----|---------|-------|----|
| 1   | ●   | 311.50  | 0.284 |    |
| 2   | ●   | 194.50  | 0.839 |    |
| 3   | ●   | 257.00  | 0.140 |    |

Figure S1.1 UV spectrum of compound 1

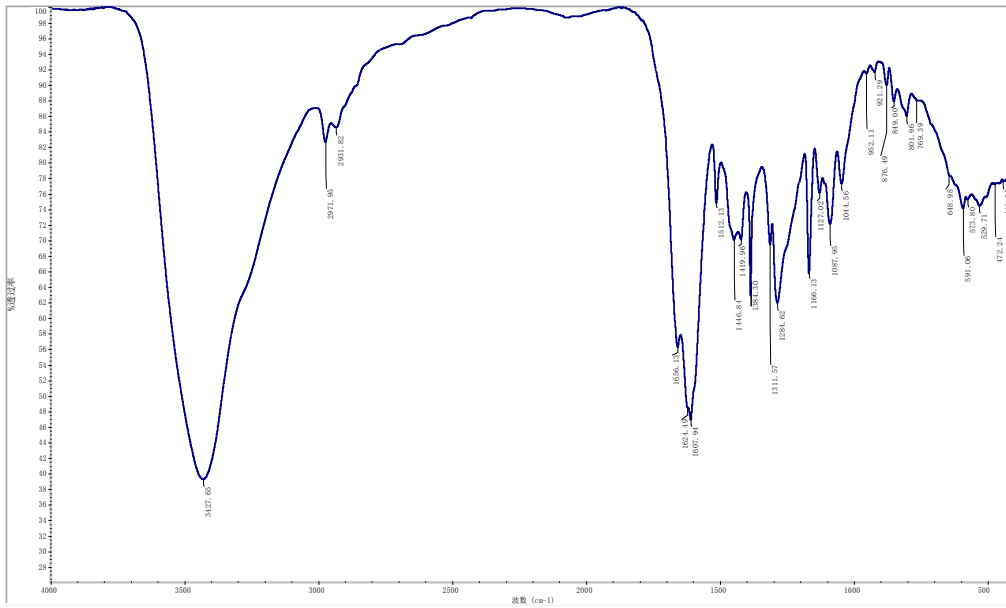

Sample Name: ZLZD-23  
 KBr压片  
 采集时间: 星期一 3月 04 15:37:04 2019 (GMT+08:00)  
 仪器型号: NICOLET iS10  
 Software version: OMNIC 9.8.372

样品扫描次数: 16  
 背景扫描次数: 16  
 分辨率: 4.000  
 采样增益: 1.0  
 动镜速度: 0.4747  
 光阑: 80.00

星期一 3月 04 15:46:25 2019 (GMT+08:00)

标峰:  
 谱图: ZLZD-23  
 范围: 4000.00 400.00  
 (绝对) 阈值: 93.933  
 灵敏度: 99

| 峰位置:    | 强度:    |
|---------|--------|
| 441.06  | 77.473 |
| 472.24  | 77.122 |
| 529.71  | 74.364 |
| 573.80  | 75.166 |
| 591.06  | 74.004 |
| 801.96  | 85.951 |
| 849.00  | 87.792 |
| 876.49  | 89.907 |
| 921.29  | 91.546 |
| 952.11  | 91.399 |
| 1044.56 | 77.244 |
| 1087.95 | 72.028 |
| 1127.02 | 75.998 |
| 1166.13 | 65.657 |
| 1284.62 | 61.904 |
| 1311.57 | 69.360 |
| 1384.30 | 62.790 |
| 1419.96 | 70.042 |
| 1446.84 | 69.981 |
| 1512.13 | 74.699 |
| 1607.94 | 46.798 |
| 1656.13 | 56.180 |
| 2931.82 | 84.468 |
| 2971.95 | 82.594 |
| 3427.65 | 39.160 |

Figure S1.2 IR spectrum of compound 1

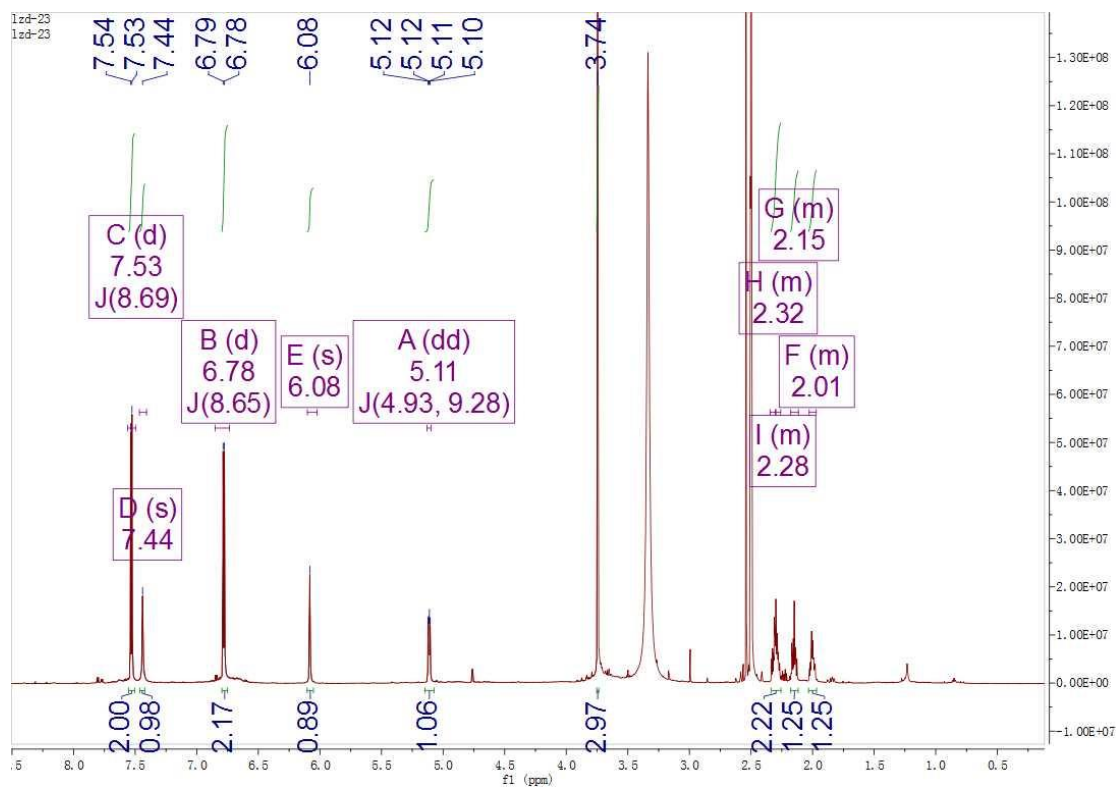

Figure S1.3  $^1\text{H}$  NMR spectrum (800 MHz,  $\text{DMSO-}d_6$ ) of compound **1**

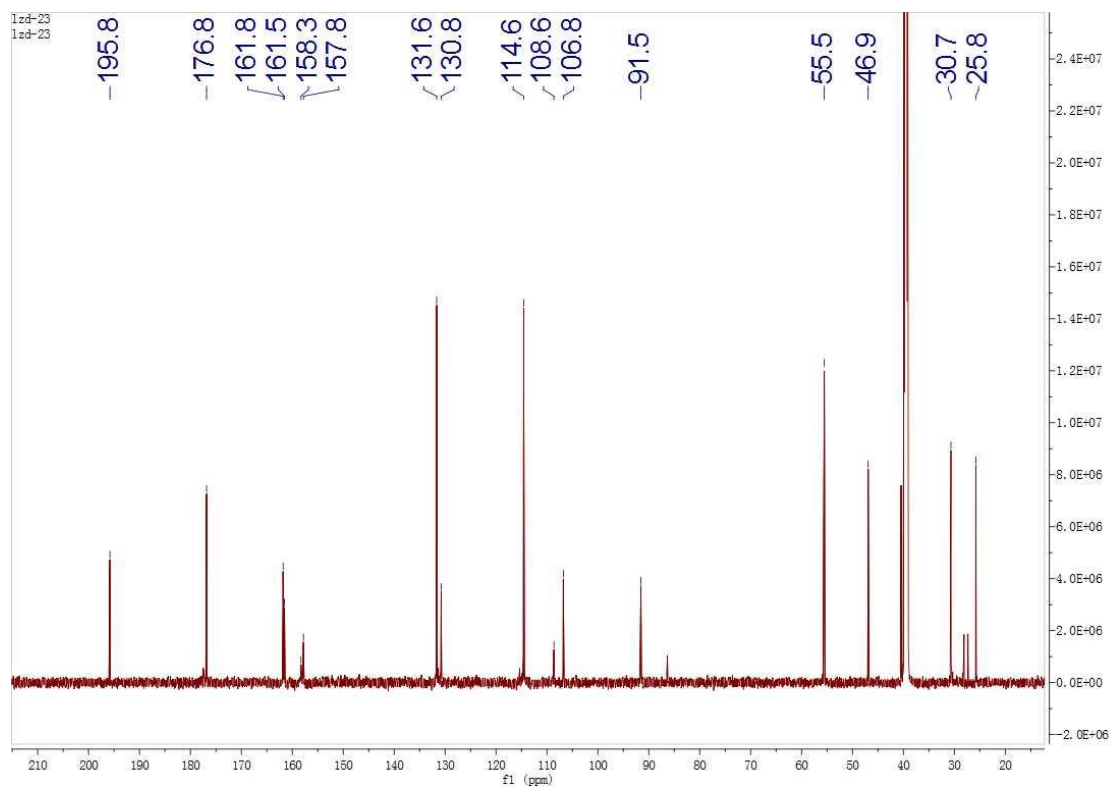

Figure S1.4  $^{13}\text{C}$  NMR spectrum (200 MHz,  $\text{DMSO-}d_6$ ) of compound **1**

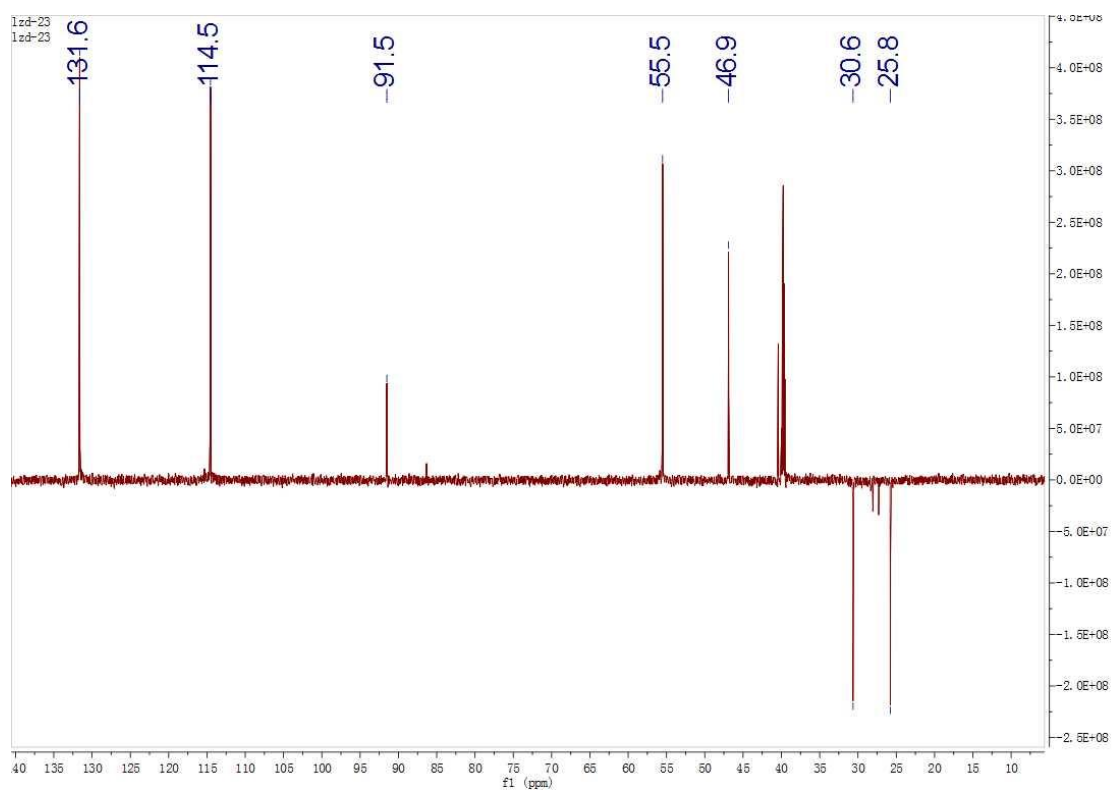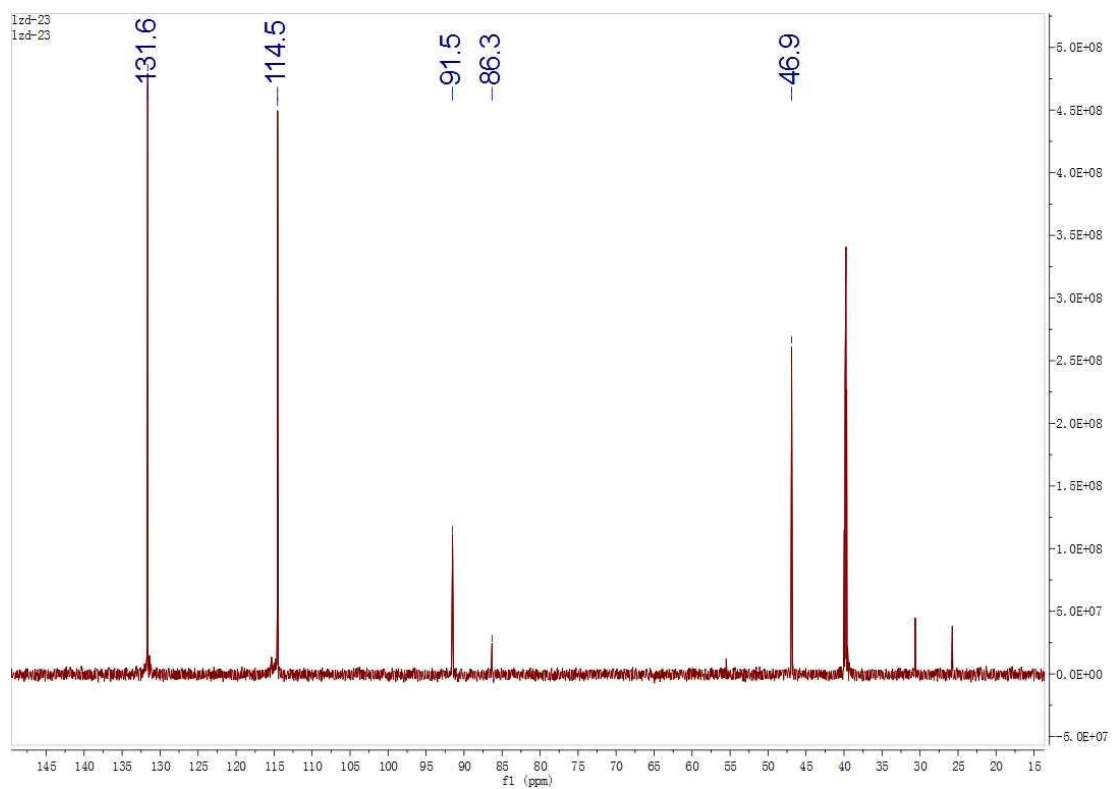

**Figure S1.5** DEPT spectrum (200 MHz, DMSO-*d*<sub>6</sub>) of compound **1**

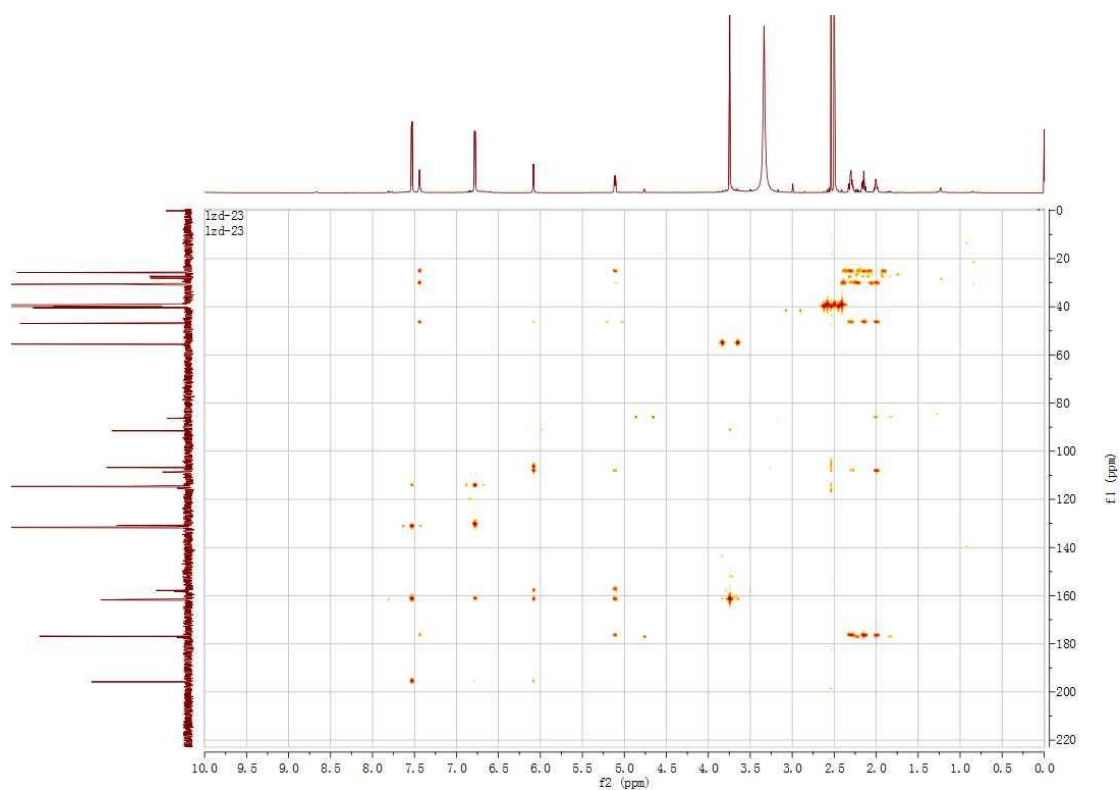

**Figure S1.6** HMBC spectrum (800 MHz, DMSO-*d*<sub>6</sub>) of compound **1**

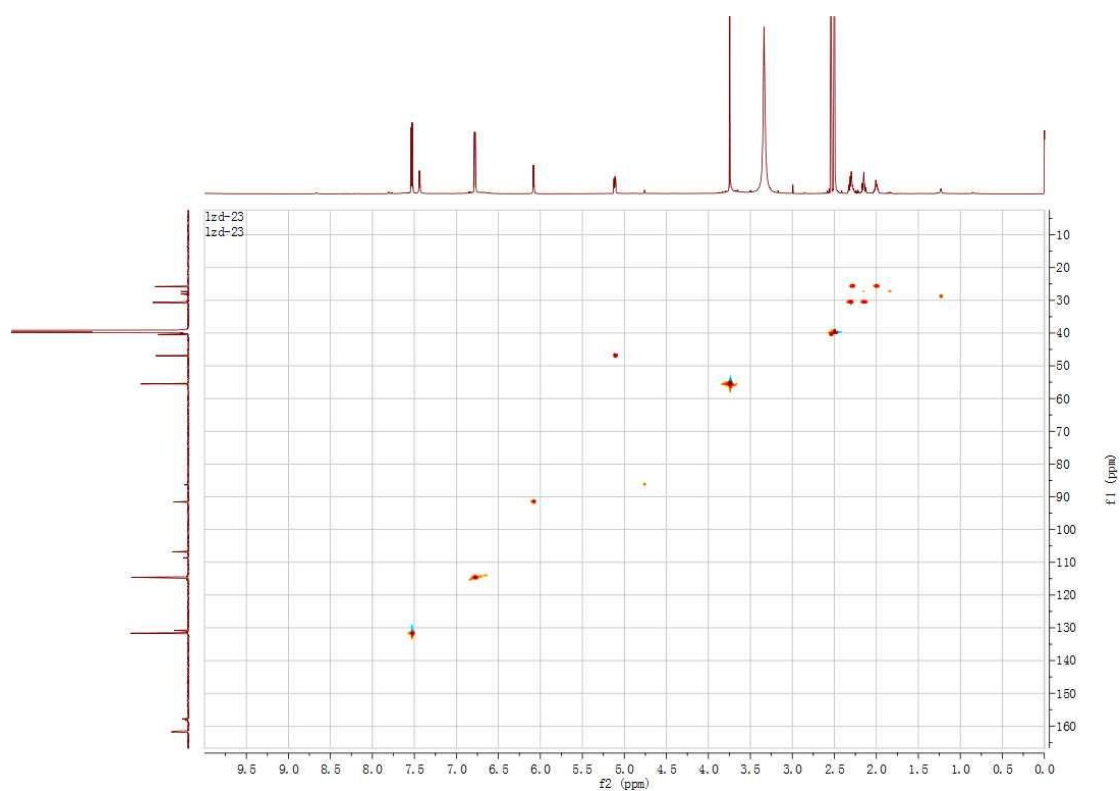

**Figure S1.7** HSQC spectrum (800 MHz, DMSO-*d*<sub>6</sub>) of compound **1**

## Qualitative Analysis Report

|                               |                      |                      |                       |
|-------------------------------|----------------------|----------------------|-----------------------|
| <b>Data Filename</b>          | 190228ESIA7.d        | <b>Sample Name</b>   | zld-23                |
| <b>Sample Type</b>            | Sample               | <b>Position</b>      |                       |
| <b>Instrument Name</b>        | Agilent G6230 TOF MS | <b>User Name</b>     | KIB                   |
| <b>Acq Method</b>             | ESI.m                | <b>Acquired Time</b> | 2/28/2019 10:31:36 AM |
| <b>IRM Calibration Status</b> | Success              | <b>DA Method</b>     | ESI.m                 |
| <b>Comment</b>                |                      |                      |                       |

|                       |                             |              |
|-----------------------|-----------------------------|--------------|
| <b>Sample Group</b>   |                             | <b>Info.</b> |
| <b>Acquisition SW</b> | 6200 series TOF/6500 series |              |
| <b>Version</b>        | Q-TOF B.05.01 (B5125.2)     |              |

### User Spectra

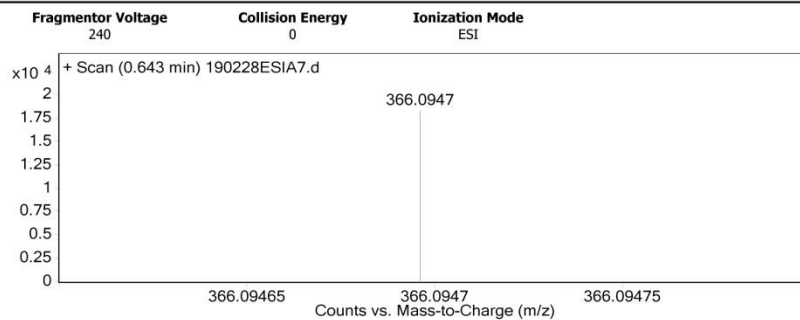

### Peak List

| <i>m/z</i> | <i>z</i> | Abund    | Formula         | Ion |
|------------|----------|----------|-----------------|-----|
| 121.0509   | 1        | 28154.41 |                 |     |
| 312.362    | 1        | 9971.65  |                 |     |
| 366.0947   | 1        | 18319.05 | C18 H17 N Na O6 | M+  |
| 367.1006   | 1        | 43828.62 |                 |     |
| 407.1217   | 1        | 11287.66 |                 |     |
| 408.1277   | 1        | 26718.01 |                 |     |
| 409.161    | 1        | 34730.88 |                 |     |
| 710.2071   | 1        | 17512.92 |                 |     |
| 711.2116   | 1        | 27672.05 |                 |     |
| 922.0098   | 1        | 29409.73 |                 |     |

### Formula Calculator Element Limits

| Element | Min | Max |
|---------|-----|-----|
| C       | 0   | 200 |
| H       | 0   | 400 |
| O       | 0   | 10  |
| Na      | 1   | 1   |
| N       | 1   | 1   |

### Formula Calculator Results

| Formula         | CalculatedMass | Mz       | Diff. (mDa) | Diff. (ppm) | DBE  |
|-----------------|----------------|----------|-------------|-------------|------|
| C18 H17 N Na O6 | 366.0954       | 366.0947 | 0.7         | 1.8         | 10.5 |

--- End Of Report ---

**Figure S1.8** HRESIMS spectrum of compound **1**



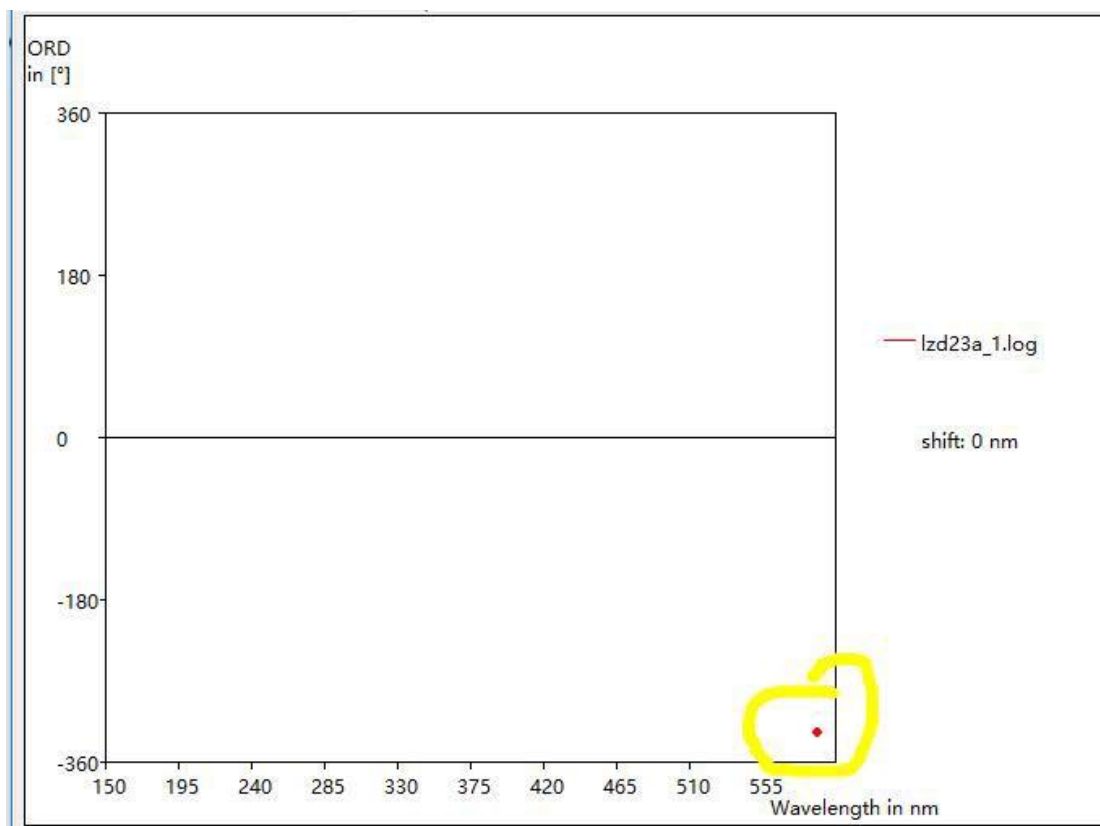

```

dimension 70 with 3 vectors. FullF1: Do perturbations 1 to 3. Dipole-
magnetic dipole polarizability for W= 0.077318:
3 1 0.154262D+02 0.164532D+02 -0.395992D+02 2 0.443034D+02 -0.960516D+02
-0.351420D+02 3 -0.401683D+03 -0.432994D+02 0.893424D+02 w= 0.077318 a.u.,
Optical Rotation Beta= -2.9057 au. Molar Mass = 343.3354 grams/mole, [Alpha] (
5893.0 Å) = -327.12 deg. End of Minotr F.D. properties on file 721 Mask= 2
NFrqRd= 1 NDeriv= 1 ND12= 1 LenFil= 12: Frequencies= 0.077318 Property
number 2 -- FD Optical Rotation Tensor frequency 1 0.077318:
2 3 1 0.154262D+02 0.164532D+02 -0.395992D+02 2 0.443034D+02
-0.960516D+02 -0.351420D+02 3 -0.401683D+03 -0.432994D+02 0.893424D+02 End of Minotr
F.D. properties file 722 does not exist. End of Minotr F.D. properties file 788 does
not exist. Leave Link 1002 at Wed Apr 17 21:11:08 2019, MaxMem= 4294967296 cpu:
34438.2 (Enter /soft/apps/Paid//g09/1601.exe) Copying SCF densities to generalized density
rwf, IOpCl= 0 IROHF=0.
*****

```

$[\alpha]_D^{25}$  -327.12 (*c* 0.10, MeOH) (calculated OR)

**Figure S1.9** Calculating OR spectra of compound **1**

**Table S1** Growth inhibition of HepG2 and Hep3B cells in the presence of different compounds after 72 h incubation (IC50 values in nM).

| compounds      | Cells IC50 (nM) |               |
|----------------|-----------------|---------------|
|                | HepG 2          | Hep 3B        |
| 1              | 153.10±34.30**  | 180.6±31.63** |
| 2              | 3161±207.55**   | 6250±358.93** |
| 3              | 909.10±64.37**  | 1182±55.76**  |
| 4              | 1764±105.65**   | 2274±109.78** |
| 5-Fluorouracil | 5659±315.72     | 51709±370.67  |

All data were shown as means ±SD of three independent experiments. \* $p < 0.05$ , \*\* $p < 0.01$  compared with positive control.
